# Supplementary material
Source: publisher figshare collection journal article supplement (https://springernature.figshare.com/ndownloader/files/14353484)
Supplement: Supplementary file [file 14353484]

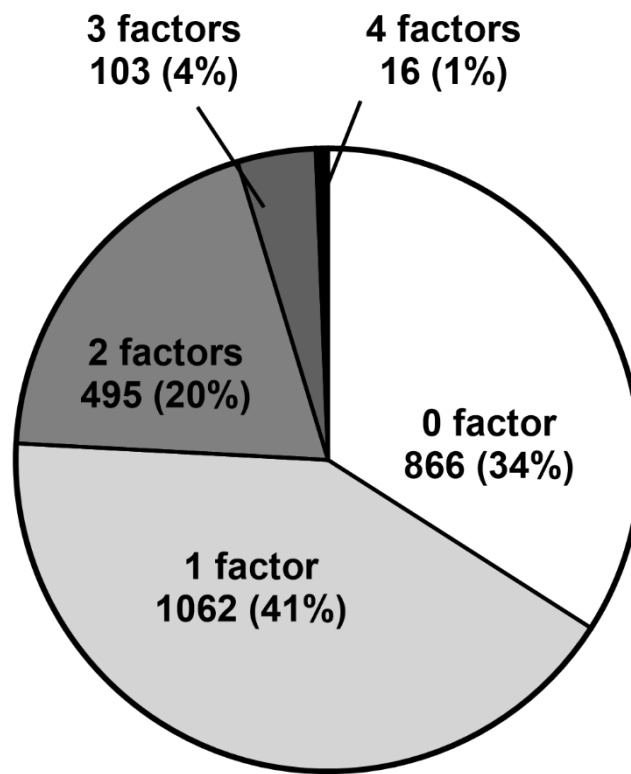

**Additional figure 2. Distribution of patients classified by the number of suggested risk factors for hypermagnesemia in patients without serum Mg monitoring (n=2542).**

Values are presented as number (%).
